# Supplementary material
Source: publisher figshare collection journal article supplement (https://sage.figshare.com/ndownloader/files/21080928)
Supplement: Supplementary file 1 [file 21080928]

## Annex-III: Questions Related to Socio-demographic information, knowledge and Practice of pregnant mother about HBV, HCV & HIV.

**Name of Health facility___________________ANC Code__________________**

**Part-I: To be filled by pregnant women**

1. Age of pregnant women 1. ≤ 20 2. 21-30 3. ≥ 31
2. Marital Status: 1. Single 2. Married 3.Divorced 4. Widowed
3. Gravidity: 1. Primigravida 2. Multigravida
4. Parity: 1.Nullipara 2.Multipara (2.1st 3. 2nd 4. 3rd 5. 4th 6. 5th  7.6th)
5. Gestation age 1. First trimester 2. Second trimester 3. Third trimester
6. Occupation of the woman:1. House wife 2. Civil servant 3. Daily labourer 4. Trader

5. Student 7. NGO Worker 8. Shop-keeper

1. Residence: 1. Urban 2. Rural
2. Educational status: 1. Illiterate 2. __Grade 2. Certificate 3. Diplomma 4. B.Sc
3. Risk factors 1. Dental Procedure 2. Surgical procedure 3. Tattooing 4. Caesarian Section 5. History of Abortion 6. History of Blood transfussion 7. History of Ear Piercing 8. No Risk factors
4. History of Miscarriage: 1. Yes 2. No If yes , mention___________
5. History of surgical procedures 1. Yes 2. No
6. If Yes, how many times____________?
7. History of home delivery by traditional birth attendants 1. Yes 2. No
8. If Yes, during which delivery? Mention__________
9. History of blood transfusion: 1. Single 2. Multiple
10. If your response is "2", how many times? Mention______________
11. How often did you used Contraceptives?: 1. Never 2. Once 3. Tries 4. Many times
12. History of tattooing/scarification: 1. Yes 2. No
13. History of nose piercing: 1. Yes 2. No
14. History of ear piercing 1. Yes 2. No
15. Dental Procedure in the health center : 1. Yes 2. No
16. If so, how many times? ____________
17. Sharing needles: 1. Yes 2. No
18. Husband’s occupation 1. Farmer 2. Gov't employee 3. Daily laborer 4. Shopkeeper 5. student 6. NGO Worker 7. Shofer
19. Level of education of the husband: 1. Illiterate 2.Literate
20. If your response is "2", explain his educational level ? 1. __Grade 2. Certificate 3. Diplomma 4. B.Sc 5. M.SC
21. HIV status of the pregnant women: 1. Positive 2. Negative
22. What about her husband's? 1. Positive 2. Negative

**Thank you very much!!!**

**Part-II. *To be filled by Laboratory professional only***

1. HBsAg-rapid test result 1. Positive 2. Negative What about ELISA test?____________
2. HCVAntibody-rapid test 1. Positive 2. Negative ELISA test result_________________
3. Other STD infection 1. Positive 2. Negative If positive? Mention __________________
4. Blood group & Rh_________
5. Haemoglobin__________
6. RPR_____________
